# Supplementary material for: Implementation of health independent Domestic Violence Advisors (hIDVA): A qualitative study in five NHS Trusts.
Source: Research Square preprint supplement (doi:10.21203/rs.3.rs-8590076/v1), 2026-02-02
Supplement: Supplementary file 1 [file 4d1d044ed5f2b1d3c194770b.docx]

**The RIVA study: WP2 Interviews for clinical staff:**

**Follow-up topic guide**

*****NOTE – the questions in this topic guide are likely to change as more data is gathered during the case study evaluation and we identify specific contextual information for each of the three study sites, including how each IDVA model operates*****

***Aim:*** Interviews with staff will be conducted at two time-points: 1) at the start of the case study evaluation, and 2) at the end of the case study evaluation. This topic guide represents the interview at the end of the case study evaluation. The aim of the staff interviews are to explore staff expectations and experiences of the IDVA model, staff views about the ways in which the programme’s components are implemented, and staff thoughts on enabling and constraining factors around the implementation of the IDVA model. Interviews will also explore staff views and experiences of working with Safelives around the implementation of the IDVA model.

***Pre-interview***

- Develop a rapport with the participant. The approach to this will vary depending on the individual participant but the key aspect will be showing to them that the interviewer is there to listen to them and that their views are considered valuable and interesting;
- Ensure the participant has read the information sheet, provide an opportunity to ask questions, confirm confidentiality and check they have signed the consent form;
- Reassure the participant that there are no right or wrong answers, but that we are interested in exploring their views;
- Ensure audio recorder is on (or set to record if conducting interview remotely through Zoom/Teams etc);
- It will be important for the researcher to read the previous interview from baseline to frame the questions for the follow-up interview.

***ICE BREAKER QUESTION***

- How has your knowledge of IDVAs changed since the start of this programme?
- What has your experience been of implementing/working with IDVA’s in your service?

***GENERAL QUESTIONS***

- - How much involvement have you had with the (implementation of) IDVAs?
  - Do you know if the IDVA has been implemented according to the implementation plan? If Yes: Can you describe this? If No: Why not?
  - Are you aware of the role of Safelives (a specialist DVA organisation) in supporting the implementation of the IDVA model?

*Probe: If yes, what do you think about the work Safelives did? Do you think the work of Safelives had any impact on the success of the implementation?*

- Do you think the Trust’s culture (general beliefs, values, assumptions that people embrace) has shaped the implementation of IDVAs? If yes, in what way?
  - Are you aware of other Trust staff/colleagues who have acted as champions of the IDVA model?

*Probe: If yes, do you think these roles had any impact on the success of the implementation?*

***QUESTIONS FOR STAFF INVOLVED IN THE IMPLEMENTATION OF THE MODEL***

- Has the IDVA model been implemented according to the implementation plan?

*Probe: If Yes: Can you describe this? If No: Why not?*

- How complicated, if at all, has it been to implement the IDVA programme?
- Did you have enough resources to overcome any implementation issues?

*Probe: If Yes: Can you describe this? If No: Why not?*

- What has your experience been of working with Safelives to implement the IDVA model?

*Probe: Do you feel it has been useful to have their input? Did they meet your expectations? Is there anything you would have liked them to do that they didn’t?*

- If applicable, could you tell me about your experience of taking part in the regular brief check-in research interviews with the RIVA team?
  - *Did the exercise feel feasible to take part in?*
  - *Did you learn anything from this exercise?*
  - *Do you feel this exercise has had an impact on the implementation of the IDVA model?*
  - *If we were to do this exercise again, what advice would you give us on making it meaningful for staff?*
- Do you feel your Trust/maternity services are likely to keep IDVA’s a priority?

***EXPERIENCE OF THE IDVA SERVICE***

- Have you made any referrals to the IDVA(s)?

*Probe: If yes, can you describe the process?*

- What support, such as documents/toolkits, have been available to help you implement/refer to IDVAs?

*Probe: What is your perception of these materials?*

- What training, if any, have you received as part of the IDVA programme? Did this training meet your needs? If yes, why? If no, why?

***VIEWS ABOUT THE IDVA MODEL***

- - Thinking about your expectations of the IDVA project at the start, do you feel these have been met? If yes, why? If no, why?
- To what extent do you think the IDVA programme meets the needs of service users who are experiencing DVA?

*Probes: What changes would you make? Are there any barriers to making these improvements?*

- - What would you say have been the biggest facilitators in implementing/working with IDVAs?
  - What would you say have been the biggest barriers in implementing/working with IDVAs?
- What, if any, changes or alterations need to be made to IDVA role so it works more effectively in your setting?
- Are there components that should not be altered?
- Do you feel the knowledge that Trust/senior management teams had about the IDVA model had any impact on the successful implementation of the model?
- Do you feel there are additional influences that might affect the ongoing success of the IDVA model?

***CLOSING***

- Is there anything else you would like to add that we have not covered?
