# Supplementary material for: Implementation of health independent Domestic Violence Advisors (hIDVA): A qualitative study in five NHS Trusts.
Source: Research Square preprint supplement (doi:10.21203/rs.3.rs-8590076/v1), 2026-02-02
Supplement: Supplementary file 2 [file ffa560ab9abe8370805f4c86.docx]

**Interviews for clinical staff: Baseline topic guide**

*****NOTE – the questions in this topic guide are likely to change as more data is gathered during the case study evaluation and we identify specific contextual information for each of the three study sites, including how each IDVA model operates*****

***Aim:*** Interviews with staff will be conducted at two time-points: 1) at the start of the case study evaluation and 2) at the end of the case study evaluation. This topic guide represents the questions to be asked of staff at the start of the case study evaluation. The aim of the staff interviews are to explore staff expectations and experiences of the IDVA model, staff views about the ways in which the programme’s components are implemented, and staff thoughts on enabling and constraining factors around the implementation of the IDVA model. Interviews will also explore staff views and experiences of working with Safelives around the implementation of the IDVA model.

***Pre-interview***

- Develop a rapport with the participant. The approach to this will vary depending on the individual participant but the key aspect will be showing them that the interviewer is there to listen to them and that their views are considered valuable and interesting;
- Ensure the participant has read the information sheet, has been provided with an opportunity to ask questions;
- Ensure the researcher has confirmed issues of confidentiality, including limitations to this, and check that the participant has signed the consent form;
- Reassure the participant that there are no right or wrong answers, but that we are interested in exploring their views;
- Explain that interviews should take approx. 60mins;
- Ensure audio recorder is on (or set to record if conducting interview remotely through Zoom/Teams etc);
- If possible check the stage of implementation the Trust is at with their IDVA before the interview, questions may need to be adapted to accommodate this.

***ICE BREAKER QUESTIONS***

- Would you be able to tell me a bit about your role?
- To what extent do you think your job requires an understanding of issues of DVA?

***GENERAL QUESTIONS***

- - What did you know about IDVAs before this project started?
  - Do you know how the idea of implementing an IDVA came about?

*Probes: What was the motivation (e.g. was there a sense of a strong need for this)?*

- Who is leading the IDVA implementation in the Trust?
- Is there a formal plan to implement IDVA at the Trust?
- At what stage of implementation is the IDVA at in your Trust? What has happened so far?
- How does IDVA programme compare to other DVA initiatives that may have been considered/undertaken by your Trust?
- How do you think the Trust’s culture (general beliefs, values, assumptions that people embrace) will affect the implementation of IDVAs?

*Probe: To what extent are new ideas generally embraced and used to make improvements in the Trust?*

**EXPECTATIONS FOR THE IDVA PROGRAMME**

- - - What are your expectations of the IDVA project? What do you think will work well? What not so well?
    - What do you feel are the biggest potential barriers in implementing/working with IDVAs?

*Probe: prompt around any external barriers e.g. policy changes etc.*

- - - What do you feel are the potential biggest potential advantages in implementing/working with IDVAs?
    - Do you think your Trust has sufficient resources to successfully implement IDVA practices? If yes, why? If no, why?

*Probe: If implementation issues arise, do you feel your Trust will be able to address them in a timely way?*

- In your view, what outcomes, impacts or changes following the introduction of IDVAs are the most important to see?
- In your view, what outcomes, impacts or changes would allow you to make an informed decision about whether, and how to implement an IDVA programme?

*Probe: Anything else?*

**KNOWLEDGE ABOUT IDVA PROGRAMME**

- What knowledge do you think Trust/senior management teams, have about the IDVA programme?
- What knowledge do you think your clinical and non-clinical colleagues have about the IDVA programme? Do you think they generally understand it well?
- What knowledge do you think service users have about the IDVA programme?

**YOUR EXPERIENCE OF THE IDVA PROGRAMME**

- What support, such as documents/toolkits, are available to help you implement/refer to IDVAs?

*Probe: What is your perception of these materials?*

- What training, if any, have you/will you receive as part of the IDVA programme?

*Probe: if already received training, did this training meet your needs? If yes, why? If no, why? How has the training has impacted on your professional practice and awareness of DVA issues?*

- What is your knowledge/experience of the Safelives team who are supporting the implementation of the IDVA model?

*Probe: If knowledge/experience, what do you think of them? What support would you like them to provide to the Trust? Do you think they will be able to deliver this? If yes, why? If no, why not?*

- To what extent do you think the IDVA programme will meet the needs of service users you support who are experiencing DVA?

*Probe: Are there additional service user needs that you think the IDVA programme does not account for? What are those? How in your opinion it could be improved to account for these needs?*

- Have you made a referral to an IDVA(s)? If yes, can you describe this process
- How might Covid-19, if any, affect the implementation of the IDVA model in your Trust or service?

**CLOSING**

- Is there anything else you would like to add that we have not covered?
